# Supplementary material
Source: publisher site journal article supplement (https://www.spandidos-publications.com/2148/downloadSupplementary)
Supplement: Supplementary file 1 [file downloadSupplementary]

## Sheet: blue_KEGG
Table SV. Go term and KEGG pathway of blue module
ID	Description	GeneRatio	BgRatio	pvalue	p.adjust	qvalue	geneID	Count
hsa04310	Wnt signaling pathway	41/1080	160/7946	3.00502e-05	0.00647634	0.00532863	AXIN2/CHD8/CREBBP/CSNK1E/CTBP1/CTNNB1/DAAM2/DKK2/DKK4/DVL2/DVL3/EP300/FRAT2/FZD1/FZD2/GSK3B/INVS/LRP5/MAPK9/NFATC1/NFATC2/NFATC3/NFATC4/NKD1/NLK/PORCN/PPARD/PRKACA/ROR2/SFRP1/SFRP2/SIAH1/TBL1X/TCF7/TCF7L1/TP53/WNT10A/WNT11/WNT2/WNT5A/ZNRF3	41
hsa04140	Autophagy - animal	36/1080	137/7946	5.12964e-05	0.00647634	0.00532863	AKT2/AMBRA1/ATG13/ATG2A/ATG2B/ATG3/ATG4A/ATG4B/ATG4C/BCL2L1/CAMKK2/CTSD/DAPK1/DAPK3/DDIT4/EIF2AK4/IGF1R/IRS1/MAPK9/MTMR3/MTMR4/PDPK1/PIK3CA/PIK3R2/PIK3R4/PPP2CB/PRKACA/PRKCD/RAF1/RPTOR/TSC1/TSC2/ULK1/WDR41/WIPI2/ZFYVE1	36
hsa04510	Focal adhesion	47/1080	199/7946	7.58036e-05	0.00647634	0.00532863	AKT2/ARHGAP35/BCAR1/BIRC2/CHAD/COL1A1/COL1A2/COL6A2/COL6A3/COL9A1/COL9A3/CRKL/CTNNB1/ELK1/FLNC/FLT4/GSK3B/IGF1R/ITGA1/ITGA11/ITGA9/ITGB3/ITGB5/ITGB6/LAMA4/MAPK9/MYL7/MYLPF/PDGFA/PDGFRB/PDPK1/PIK3CA/PIK3R2/PPP1CB/PPP1R12C/RAF1/RAPGEF1/SHC2/SOS2/SPP1/SRC/TLN2/TNR/TNXB/VAV2/VEGFB/VEGFC	47
hsa04919	Thyroid hormone signaling pathway	32/1080	119/7946	8.19789e-05	0.00647634	0.00532863	AKT2/ATP1A4/ATP1B2/BMP4/CASP9/CREBBP/CTNNB1/EP300/GSK3B/HDAC3/ITGB3/KAT2A/KAT2B/MED12/MED13/MED13L/MED16/MED24/MED27/NOTCH2/PDPK1/PIK3CA/PIK3R2/PLCD3/PRKACA/RAF1/RXRA/RXRB/SLC16A2/SRC/TP53/TSC2	32
hsa04330	Notch signaling pathway	18/1080	53/7946	0.00012773	0.00807251	0.00664194	ATXN1/ATXN1L/CREBBP/CTBP1/DLL1/DTX1/DTX4/DVL2/DVL3/EP300/HEYL/JAG2/KAT2A/KAT2B/MAML1/NCOR2/NOTCH2/RFNG	18
hsa04550	Signaling pathways regulating pluripotency of stem cells	35/1080	140/7946	0.000190767	0.0100471	0.00826657	ACVR1/AKT2/AXIN2/BMP4/CTNNB1/DVL2/DVL3/FGF2/FGFR1/FZD1/FZD2/GSK3B/ID2/IGF1R/INHBA/INHBB/KAT6A/MAPK11/MAPK12/PCGF2/PCGF6/PIK3CA/PIK3R2/RAF1/SETDB1/SKIL/SMAD2/TBX3/TCF3/TCF7/WNT10A/WNT11/WNT2/WNT5A/ZFHX3	35
hsa04211	Longevity regulating pathway	25/1080	89/7946	0.000229898	0.0102871	0.00846405	ADCY1/ADCY5/ADCY6/ADCY9/AKT2/ATG13/CAMKK2/CAT/EHMT1/EHMT2/IGF1R/INSR/IRS1/NFKB1/PIK3CA/PIK3R2/PRKACA/RELA/RPTOR/SESN1/SIRT1/TP53/TSC1/TSC2/ULK1	25
hsa04150	mTOR signaling pathway	37/1080	153/7946	0.000260432	0.0102871	0.00846405	AKT2/CAB39/DDIT4/DEPDC5/DVL2/DVL3/FLCN/FZD1/FZD2/GSK3B/IGF1R/IKBKB/INSR/IRS1/LRP5/MAPKAP1/NPRL2/NPRL3/PDPK1/PIK3CA/PIK3R2/PRR5/RAF1/RPTOR/SOS2/STRADA/TELO2/TNF/TSC1/TSC2/TTI1/ULK1/WDR59/WNT10A/WNT11/WNT2/WNT5A	37
hsa05215	Prostate cancer	26/1080	97/7946	0.000391818	0.0119441	0.00982741	AKT2/ARAF/CASP9/CREBBP/CTNNB1/EP300/ERG/FGFR1/GSK3B/IGF1R/IKBKB/IKBKG/INSRR/NFKB1/PDGFA/PDGFRB/PDPK1/PIK3CA/PIK3R2/RAF1/RELA/SOS2/TCF7/TCF7L1/TP53/ZEB1	26
hsa04010	MAPK signaling pathway	61/1080	295/7946	0.000402642	0.0119441	0.00982741	AKT2/ARAF/CACNA1C/CACNB3/CACNG8/CDC25B/CRKL/CSF1/DAXX/DDIT3/DUSP8/EFNA5/ELK1/EPHA2/FGF2/FGF22/FGFR1/FLNC/FLT4/GNA12/IGF1R/IKBKB/IKBKG/IL1R1/INSR/MAP2K4/MAP2K6/MAP3K1/MAP3K12/MAP3K3/MAP4K2/MAPK11/MAPK12/MAPK7/MAPK8IP3/MAPK9/MKNK2/NFATC1/NFATC3/NFKB1/NLK/PDGFA/PDGFRB/PLA2G4A/PLA2G4B/PRKACA/RAF1/RAPGEF2/RASA1/RASGRF2/RASGRP2/RASGRP4/RELA/SOS2/TAB1/TAB2/TGFBR2/TNF/TP53/VEGFB/VEGFC	61
hsa05161	Hepatitis B	38/1080	162/7946	0.000415775	0.0119441	0.00982741	AKT2/APAF1/ARAF/CASP9/CREBBP/ELK1/EP300/IKBKB/IKBKG/MAP2K4/MAP2K6/MAP3K1/MAPK11/MAPK12/MAPK9/MAVS/NFATC1/NFATC2/NFATC3/NFATC4/NFKB1/PIK3CA/PIK3R2/RAF1/RELA/SLC10A1/SOS2/SRC/STAT5B/STAT6/TAB1/TAB2/TGFBR2/TICAM1/TICAM2/TIRAP/TNF/TP53	38
hsa05217	Basal cell carcinoma	19/1080	63/7946	0.000479473	0.0126261	0.0103886	AXIN2/BMP2/BMP4/CTNNB1/DVL2/DVL3/FZD1/FZD2/GSK3B/HHIP/KIF7/SUFU/TCF7/TCF7L1/TP53/WNT10A/WNT11/WNT2/WNT5A	19
hsa04912	GnRH signaling pathway	24/1080	93/7946	0.00115963	0.0249097	0.0204953	ADCY1/ADCY5/ADCY6/ADCY9/CACNA1C/ELK1/ITPR3/LHB/MAP2K4/MAP2K6/MAP3K1/MAP3K3/MAPK11/MAPK12/MAPK7/MAPK9/MMP2/PLA2G4A/PLA2G4B/PRKACA/PRKCD/RAF1/SOS2/SRC	24
hsa05135	Yersinia infection	29/1080	120/7946	0.00117543	0.0249097	0.0204953	AKT2/ARHGEF7/BCAR1/CRKL/GIT2/GSK3B/IKBKB/IKBKG/MAP2K4/MAP2K6/MAPK11/MAPK12/MAPK9/NFATC1/NFATC2/NFATC3/NFKB1/PIK3CA/PIK3R2/PIP5K1A/RELA/SRC/TAB1/TAB2/TICAM1/TNF/VAV2/WASF2/WIPF2	29
hsa04910	Insulin signaling pathway	32/1080	137/7946	0.00124184	0.0249097	0.0204953	ACACA/AKT2/ARAF/CBLB/CRKL/ELK1/EXOC7/FLOT2/GSK3B/IKBKB/INSR/IRS1/LIPE/MAPK9/MKNK2/PDPK1/PHKA2/PHKG2/PIK3CA/PIK3R2/PPP1CB/PPP1R3D/PRKACA/PRKAR1B/RAF1/RAPGEF1/RPTOR/SHC2/SOCS2/SOS2/TSC1/TSC2	32
hsa04390	Hippo signaling pathway	35/1080	154/7946	0.00126125	0.0249097	0.0204953	AXIN2/BIRC2/BMP2/BMP4/CSNK1E/CTNNA3/CTNNB1/DLG4/DVL2/DVL3/FRMD6/FZD1/FZD2/GSK3B/ID2/LATS2/LLGL1/NF2/NKD1/PPP1CB/PPP2CB/PPP2R2D/SCRIB/SMAD2/SMAD7/SNAI2/TCF7/TCF7L1/TEAD2/TGFBR2/WNT10A/WNT11/WNT2/WNT5A/WTIP	35
hsa05163	Human cytomegalovirus infection	47/1080	225/7946	0.00144405	0.0268424	0.0220855	ADCY1/ADCY5/ADCY6/ADCY9/AKAP13/AKT2/ARHGEF11/BCAR1/CALR/CASP9/CCL4L2/CRKL/CTNNB1/ELK1/GNA12/GNB3/GNG11/GNG7/GSK3B/IKBKB/IKBKG/IL10RB/IL1R1/ITGB3/ITPR3/MAP2K6/MAPK11/MAPK12/NFATC1/NFATC2/NFATC3/NFATC4/NFKB1/PDIA3/PIK3CA/PIK3R2/PRKACA/PTGER2/RAF1/RELA/SOS2/SP1/SRC/TNF/TP53/TSC1/TSC2	47
hsa05225	Hepatocellular carcinoma	37/1080	168/7946	0.00169934	0.0298329	0.0245461	AKT2/ARAF/ARID1A/ARID1B/AXIN2/BCL2L1/CTNNB1/DVL2/DVL3/ELK1/FRAT2/FZD1/FZD2/GAB1/GSK3B/GSTM2/GSTM4/IGF1R/LRP5/PHF10/PIK3CA/PIK3R2/RAF1/SHC2/SMAD2/SMARCA4/SMARCD1/SOS2/TCF7/TCF7L1/TGFBR2/TP53/TXNRD2/WNT10A/WNT11/WNT2/WNT5A	37
hsa04926	Relaxin signaling pathway	30/1080	129/7946	0.00186928	0.031089	0.0255796	ADCY1/ADCY5/ADCY6/ADCY9/AKT2/COL1A1/COL1A2/COL3A1/GNB3/GNG11/GNG7/MAP2K4/MAPK11/MAPK12/MAPK9/MMP2/NFKB1/PIK3CA/PIK3R2/PRKACA/RAF1/RELA/RXFP1/SHC2/SMAD2/SOS2/SRC/TGFBR2/VEGFB/VEGFC	30
hsa05224	Breast cancer	33/1080	147/7946	0.00212458	0.033401	0.0274818	AKT2/ARAF/AXIN2/CTNNB1/DLL1/DVL2/DVL3/FGF2/FGF22/FGFR1/FLT4/FRAT2/FZD1/FZD2/GSK3B/HEYL/IGF1R/JAG2/LRP5/NOTCH2/PIK3CA/PIK3R2/RAF1/SHC2/SOS2/SP1/TCF7/TCF7L1/TP53/WNT10A/WNT11/WNT2/WNT5A	33
hsa04120	Ubiquitin mediated proteolysis	31/1080	136/7946	0.00221969	0.033401	0.0274818	ANAPC2/BIRC2/BIRC6/CBLB/CUL7/FBXO4/FZR1/HERC1/HERC2/HERC3/HERC4/HUWE1/MAP3K1/MGRN1/NEDD4/PIAS3/PML/PRPF19/RCHY1/RHOBTB2/SIAH1/SMURF1/SMURF2/UBA1/UBE2J2/UBE2O/UBE2S/UBE4A/UBE4B/VHL/WWP2	31
hsa04136	Autophagy - other	11/1080	32/7946	0.0023346	0.0335333	0.0275907	ATG13/ATG2A/ATG2B/ATG3/ATG4A/ATG4B/ATG4C/PIK3R4/PPP2CB/RPTOR/WIPI2	11
hsa05231	Choline metabolism in cancer	24/1080	98/7946	0.00249724	0.0343098	0.0282296	AKT2/CHKB/DGKQ/DGKZ/MAPK9/PDGFA/PDGFRB/PDPK1/PIK3CA/PIK3R2/PIP5K1A/PLA2G4A/PLA2G4B/RAF1/RALGDS/SLC22A1/SLC22A5/SLC44A2/SOS2/SP1/TSC1/TSC2/WASF1/WASF2	24
hsa05213	Endometrial cancer	16/1080	58/7946	0.00361563	0.0476058	0.0391694	AKT2/ARAF/AXIN2/CASP9/CTNNA3/CTNNB1/ELK1/GSK3B/PDPK1/PIK3CA/PIK3R2/RAF1/SOS2/TCF7/TCF7L1/TP53	16

## Sheet: blue_Go
ID	Description	GeneRatio	BgRatio	pvalue	p.adjust	qvalue	geneID	Count
GO:0003713	transcription coactivator activity	80/2341	319/17697	6.73519e-09	7.54341e-06	6.85571e-06	ABL1/ARID1A/ARID1B/ARNT/ASXL1/BIRC2/CDK7/CITED4/CREBBP/CTNNB1/DAXX/DTX1/E4F1/EP300/FGF2/FOXC1/FUS/GATA3/GMEB1/GMEB2/HCFC1/HYAL2/IL31RA/KAT2A/KAT2B/KAT6A/KDM5A/KLF7/MAML1/MED12/MED13/MED16/MED24/MED26/MED27/MMS19/MTA1/MTF1/NCOA6/NFATC4/NFYC/NME2/NR1H2/NR2C2/NRIP1/NRL/PHF2/PML/PPARA/PPARD/PRRX1/RARB/RARG/RBM14/RBPMS/RERE/RNF4/RRP1B/RXRA/RXRB/SERTAD2/SMARCA4/SMARCD1/SOX11/SP4/SRCAP/SS18L1/TADA2B/TAD…	80
GO:0005085	guanyl-nucleotide exchange factor activity	55/2341	214/17697	6.45233e-07	0.000352297	0.000320179	ABR/AKAP13/ANKRD27/ARHGEF10/ARHGEF10L/ARHGEF11/ARHGEF17/ARHGEF18/ARHGEF19/ARHGEF2/ARHGEF40/ARHGEF7/BCAR3/DENND1A/DENND2A/DENND4A/DOCK10/DOCK4/DOCK7/DOCK9/EIF2B3/FARP1/FGD1/FGD5/FLCN/GBF1/HERC1/HERC2/IQSEC1/IQSEC2/ITSN2/MADD/MON1A/PLEKHG4/PLEKHG5/PREX2/PSD/RAB3IL1/RABGEF1/RALGDS/RAPGEF1/RAPGEF2/RASGRF2/RASGRP2/RASGRP4/RCBTB2/RGL2/RGL4/RGP1/RIC8A/SOS2/TIAM2/TRIO/VAV2/WDR41	55
GO:0003714	transcription corepressor activity	59/2341	238/17697	9.43651e-07	0.000352297	0.000320179	AEBP1/ARHGAP35/ATF7IP/ATN1/BCOR/C1D/CBFA2T2/CREBBP/CTBP1/DAXX/DDIT3/DNMT3A/DNMT3B/DPF2/DRAP1/E2F6/E4F1/FOXP3/GON4L/HDAC3/HDAC7/HDAC9/HEYL/HIRA/JAZF1/JDP2/KCNIP3/LMCD1/MIER2/MTA1/MYBBP1A/NAB2/NCOR2/NOC2L/NR0B1/NRIP1/NSD1/PHF12/PPP1R13L/RERE/SF1/SIN3B/SIRT1/SKI/SMARCA4/SPEN/SUFU/TBL1X/TLE6/TOB2/TRIB3/WTIP/YY1/ZBTB32/ZBTB7A/ZEB1/ZHX2/ZHX3/ZNF366	59
GO:0031267	small GTPase binding	93/2341	443/17697	3.07161e-06	0.000821348	0.00074647	ABR/AKAP13/ANKFY1/ANKRD27/ARHGEF10/ARHGEF10L/ARHGEF11/ARHGEF17/ARHGEF18/ARHGEF19/ARHGEF2/ARHGEF40/ARHGEF7/CDC42BPB/CLEC16A/DAAM2/DAPK3/DENND1A/DENND2A/DENND4A/DOCK4/DOCK7/DVL2/DVL3/EVI5/FARP1/FGD1/FGD5/FMNL3/GDI2/GGA1/GGA3/GOLGA5/HPS6/INF2/IPO13/IPO9/IQGAP2/ITSN2/KCTD10/KIF16B/LLGL1/MADD/MAPKAP1/MICAL3/MICALL2/MYO1C/PDE6D/PLEKHG4/PLEKHG5/PREX2/RAB11FIP5/RAB34/RAB3IL1/RABGEF1/RABGGTB/RAPGEF1/RAPGE…	93
GO:0030695	GTPase regulator activity	69/2341	304/17697	3.66673e-06	0.000821348	0.00074647	ABR/ACAP3/ADAP1/AGAP1/AGAP3/AGFG1/ANKRD27/ARAP1/ARFGAP1/ARHGAP19/ARHGAP22/ARHGAP23/ARHGAP27/ARHGAP33/ARHGAP35/ARHGEF10L/ARHGEF11/ARHGEF19/CHN2/DAB2IP/DEPDC5/DLC1/DOCK4/EVI5/FLCN/GDI2/GIT1/GIT2/GPS1/GPSM1/HTR2B/IQGAP2/LLGL1/NPRL2/NPRL3/PDE6D/PGAM5/PLXNB1/PREX2/RABEP2/RALGAPB/RALGDS/RAPGEF2/RASA1/RASA3/RASA4B/RGPD3/RGS3/RIC8A/SGSM2/SIPA1L3/SRGAP2/STARD8/SYDE1/TBC1D10B/TBC1D13/TBC1D16/TBC1D17/TBC1D2…	69
GO:0017016	Ras GTPase binding	90/2341	429/17697	4.53956e-06	0.000847384	0.000770132	ABR/AKAP13/ANKFY1/ANKRD27/ARHGEF10/ARHGEF10L/ARHGEF11/ARHGEF17/ARHGEF18/ARHGEF19/ARHGEF2/ARHGEF40/ARHGEF7/CDC42BPB/CLEC16A/DAAM2/DAPK3/DENND1A/DENND2A/DENND4A/DOCK4/DOCK7/DVL2/DVL3/EVI5/FARP1/FGD1/FGD5/FMNL3/GDI2/GOLGA5/HPS6/INF2/IPO13/IPO9/IQGAP2/ITSN2/KCTD10/KIF16B/LLGL1/MADD/MAPKAP1/MICAL3/MICALL2/MYO1C/PDE6D/PLEKHG4/PLEKHG5/PREX2/RAB11FIP5/RAB34/RAB3IL1/RABGEF1/RABGGTB/RAPGEF1/RAPGEF2/RASGRF2…	90
GO:0005096	GTPase activator activity	63/2341	273/17697	5.42153e-06	0.000867445	0.000788364	ABR/ACAP3/ADAP1/AGAP1/AGAP3/AGFG1/ANKRD27/ARAP1/ARFGAP1/ARHGAP19/ARHGAP22/ARHGAP23/ARHGAP27/ARHGAP33/ARHGAP35/ARHGEF10L/ARHGEF11/ARHGEF19/CHN2/DAB2IP/DEPDC5/DLC1/DOCK4/EVI5/FLCN/GDI2/GIT1/GIT2/HTR2B/LLGL1/NPRL2/NPRL3/PGAM5/PLXNB1/PREX2/RABEP2/RALGAPB/RAPGEF2/RASA1/RASA3/RASA4B/RGPD3/RGS3/RIC8A/SGSM2/SIPA1L3/SRGAP2/STARD8/SYDE1/TBC1D10B/TBC1D13/TBC1D16/TBC1D17/TBC1D2/TBC1D20/TBC1D24/TBC1D25/TBC1D2…	63
GO:0004402	histone acetyltransferase activity	22/2341	64/17697	1.28494e-05	0.00179892	0.00163492	BRPF1/CREBBP/DPF2/EP300/GTF2B/GTF3C4/HCFC1/KAT2A/KAT2B/KAT6A/KAT8/MCM3AP/NAA40/PHF10/PHF20/SRCAP/TADA2B/TADA3/TAF6L/TAF9/USP22/WDR5	22
GO:0061733	peptide-lysine-N-acetyltransferase activity	22/2341	66/17697	2.2362e-05	0.00251508	0.00228579	BRPF1/CREBBP/DPF2/EP300/GTF2B/GTF3C4/HCFC1/KAT2A/KAT2B/KAT6A/KAT8/MCM3AP/NAA40/PHF10/PHF20/SRCAP/TADA2B/TADA3/TAF6L/TAF9/USP22/WDR5	22
GO:0046332	SMAD binding	25/2341	80/17697	2.24561e-05	0.00251508	0.00228579	ACVR1/AXIN2/BMP2/COL1A2/COL3A1/COL5A2/CTNNB1/DAB2/MEN1/PMEPA1/PML/PURA/RNF111/SKI/SKIL/SMAD2/SMAD6/SMAD7/SMURF1/SMURF2/TGFBR2/YY1/ZBTB7A/ZC3H3/ZEB2	25
GO:0005088	Ras guanyl-nucleotide exchange factor activity	36/2341	137/17697	3.14846e-05	0.0032057	0.00291345	ABR/AKAP13/ARHGEF10/ARHGEF10L/ARHGEF11/ARHGEF17/ARHGEF18/ARHGEF19/ARHGEF2/ARHGEF40/ARHGEF7/DENND1A/DENND2A/DENND4A/FARP1/FGD1/FGD5/ITSN2/MADD/PLEKHG4/PLEKHG5/PREX2/RAB3IL1/RABGEF1/RAPGEF1/RAPGEF2/RASGRF2/RASGRP4/RCBTB2/RGL2/RGP1/SOS2/TIAM2/TRIO/VAV2/WDR41	36
GO:0060589	nucleoside-triphosphatase regulator activity	72/2341	344/17697	4.27412e-05	0.00398917	0.0036255	ABR/ACAP3/ADAP1/AGAP1/AGAP3/AGFG1/ANKRD27/ARAP1/ARFGAP1/ARHGAP19/ARHGAP22/ARHGAP23/ARHGAP27/ARHGAP33/ARHGAP35/ARHGEF10L/ARHGEF11/ARHGEF19/ATP1B2/CHN2/DAB2IP/DEPDC5/DLC1/DOCK4/EVI5/FLCN/GDI2/GIT1/GIT2/GPS1/GPSM1/HTR2B/IQGAP2/LLGL1/NPRL2/NPRL3/PDE6D/PGAM5/PLXNB1/PREX2/RAB3A/RABEP2/RALGAPB/RALGDS/RAPGEF2/RASA1/RASA3/RASA4B/RGPD3/RGS3/RIC8A/SGSM2/SIPA1L3/SRGAP2/STARD8/SYDE1/TBC1D10B/TBC1D13/TBC1D16/T…	72
GO:0005089	Rho guanyl-nucleotide exchange factor activity	24/2341	79/17697	5.43105e-05	0.00467906	0.00425249	ABR/AKAP13/ARHGEF10/ARHGEF10L/ARHGEF11/ARHGEF17/ARHGEF18/ARHGEF19/ARHGEF2/ARHGEF40/ARHGEF7/FARP1/FGD1/FGD5/ITSN2/PLEKHG4/PLEKHG5/PREX2/RASGRF2/RGL2/SOS2/TIAM2/TRIO/VAV2	24
GO:0035257	nuclear hormone receptor binding	38/2341	152/17697	6.30337e-05	0.0050427	0.00458298	ARID1A/ASXL1/BAZ2A/C1D/CALR/CDK7/CTNNB1/DAXX/EP300/FUS/GAS2L1/GTF2B/JMJD1C/LRIF1/MED12/MED13/MED16/MED24/MED25/MMS19/NCOA6/NCOR2/NR0B1/NRIP1/NSD1/NUP62/RARB/RARG/RNF4/RXRA/SIRT1/SMARCA4/SRC/STAT5B/TADA3/TOB2/ZBTB7A/ZNF366	38
GO:0005201	extracellular matrix structural constituent	39/2341	163/17697	0.000140406	0.0104836	0.0095279	AEBP1/AGRN/BGN/COL12A1/COL14A1/COL16A1/COL1A1/COL1A2/COL27A1/COL3A1/COL5A1/COL5A2/COL5A3/COL6A2/COL6A3/COL9A1/COL9A3/CRELD1/EDIL3/ELN/EMILIN1/EMILIN3/FBLN1/FBLN5/FBN1/FMOD/HMCN2/IGFBP7/IMPG2/LAMA4/MATN3/MFGE8/MXRA5/NID1/NID2/PCOLCE/SPARC/TNXB/ZP3	39
GO:0034212	peptide N-acetyltransferase activity	22/2341	75/17697	0.000193248	0.0135274	0.0122941	BRPF1/CREBBP/DPF2/EP300/GTF2B/GTF3C4/HCFC1/KAT2A/KAT2B/KAT6A/KAT8/MCM3AP/NAA40/PHF10/PHF20/SRCAP/TADA2B/TADA3/TAF6L/TAF9/USP22/WDR5	22
GO:0004674	protein serine/threonine kinase activity	84/2341	439/17697	0.000271662	0.0178978	0.0162661	AAK1/ACVR1/ADCK1/ADCK5/AKAP13/AKT2/ARAF/BRD4/BRSK1/CAB39/CAMKK1/CAMKK2/CCNK/CDC42BPB/CDK10/CDK16/CDK18/CDK19/CDK3/CDK7/CDKL4/CLK1/CLK2/CLK3/CSNK1E/DAPK1/DAPK3/DCLK2/DSTYK/EIF2AK4/ERCC2/GAK/GSK3A/GSK3B/IKBKB/LATS2/MAP2K4/MAP2K6/MAP3K1/MAP3K12/MAP3K3/MAP4K2/MAPK11/MAPK12/MAPK4/MAPK6/MAPK7/MAPK9/MARK2/MAST2/MINK1/MKNK2/NLK/NME2/PASK/PDPK1/PHKA2/PHKG2/PIK3CA/PIK3R4/PINK1/PLK2/PPM1D/PRKACA/PRKCD/PRKD1…	84
GO:0018024	histone-lysine N-methyltransferase activity	15/2341	44/17697	0.000334116	0.0207895	0.0188942	ASH1L/CXXC1/DOT1L/EHMT1/EHMT2/MEN1/NSD1/PRDM2/RBBP5/SETD1A/SETD1B/SETD5/SETD7/SETDB1/WDR5	15
GO:0019787	ubiquitin-like protein transferase activity	78/2341	407/17697	0.000419837	0.0235778	0.0214283	ARIH2/ATG3/BCOR/BIRC2/BIRC6/CBLB/CNOT4/DTX4/FBXL14/FBXL15/FBXL18/FBXL20/FBXO17/FBXO4/FEM1A/HERC1/HERC2/HERC3/HERC4/HUWE1/IRF2BPL/KCTD10/KLHL21/LRRC29/LRSAM1/MAEA/MED12/MED27/MGRN1/MIB1/MUL1/NEDD4/NEURL2/NEURL4/PDZRN3/PIAS3/PRPF19/RABGEF1/RBCK1/RC3H1/RCHY1/RNF11/RNF111/RNF121/RNF141/RNF144A/RNF150/RNF185/RNF187/RNF2/RNF215/RNF216/RNF24/RNF26/RNF31/RNF38/RNF4/RNF40/RNF41/SH3RF3/SIAH1/SMURF1/SMURF2/…	78
GO:0004842	ubiquitin-protein transferase activity	74/2341	382/17697	0.000421032	0.0235778	0.0214283	ARIH2/BCOR/BIRC2/BIRC6/CBLB/CNOT4/DTX4/FBXL14/FBXL15/FBXL18/FBXL20/FBXO17/FBXO4/FEM1A/HERC1/HERC2/HERC3/HERC4/HUWE1/IRF2BPL/KCTD10/KLHL21/LRRC29/LRSAM1/MAEA/MED12/MED27/MGRN1/MIB1/MUL1/NEDD4/NEURL2/NEURL4/PDZRN3/PRPF19/RABGEF1/RBCK1/RC3H1/RCHY1/RNF11/RNF111/RNF121/RNF141/RNF144A/RNF150/RNF185/RNF187/RNF2/RNF215/RNF216/RNF24/RNF26/RNF31/RNF38/RNF4/RNF40/RNF41/SH3RF3/SIAH1/SMURF1/SMURF2/TRIM58/UBE2…	74
GO:0001227	DNA-binding transcription repressor activity, RNA polymerase II-specific	51/2341	242/17697	0.000443723	0.0236652	0.0215078	AEBP1/ARHGAP35/ASCL3/CC2D1A/CC2D1B/E2F6/E4F1/FOXK2/GATA3/GSX1/GZF1/HES4/HEYL/HIC1/HIC2/HSF1/JDP2/KCNIP3/MXD3/MYPOP/NFATC2/NFATC3/NFATC4/NFKB1/PCGF6/POU6F1/PPARA/PPARD/PRRX1/PURA/RELA/SKIL/SNAI2/SP2/TBX15/TBX2/TBX3/TCF3/TCF7/YY1/ZBTB4/ZBTB5/ZBTB7A/ZEB1/ZEB2/ZFHX3/ZFPM1/ZGPAT/ZNF224/ZNF668/ZNF746	51
GO:0140030	modification-dependent protein binding	34/2341	144/17697	0.000471753	0.0240165	0.021827	AGAP3/ANKRD13D/ATRIP/BAG6/BAZ2A/BRD3/BRD4/BRD9/CBX2/CHD8/DPF2/HDAC6/IKBKG/KAT8/KDM4A/KDM5A/MPHOSPH8/MSH6/NCAPD3/PHF1/PHF13/PHF19/PHF2/PHF8/PRPF8/RBBP5/SMARCA4/SPIN4/TAB2/UBQLN2/UBQLN4/UIMC1/WDR5/YEATS2	34
GO:0030020	extracellular matrix structural constituent conferring tensile strength	14/2341	41/17697	0.000513916	0.0250255	0.022744	COL12A1/COL14A1/COL16A1/COL1A1/COL1A2/COL27A1/COL3A1/COL5A1/COL5A2/COL5A3/COL6A2/COL6A3/COL9A1/COL9A3	14
GO:0042393	histone binding	43/2341	197/17697	0.000562792	0.0262636	0.0238693	BAZ2A/BRD3/BRD4/BRD9/CBX2/CHD8/DAXX/DPF2/INO80/IPO9/KAT6A/KAT8/KDM4A/KDM5A/MCM3AP/MLLT6/MPHOSPH8/MSH6/NCAPD3/NOC2L/PHF1/PHF10/PHF13/PHF19/PHF2/PHF8/RBBP4/RBBP5/SAP30L/SIRT1/SMARCA4/SPHK2/SPIN4/SRCAP/SUPT6H/TBL1X/UHRF2/UIMC1/USP3/USP49/WDR5/WDTC1/YEATS2	43
GO:0046965	retinoid X receptor binding	8/2341	17/17697	0.000740296	0.0319176	0.0290078	FUS/MED25/NCOA6/NCOR2/NRIP1/NSD1/RARB/RARG	8
GO:0046966	thyroid hormone receptor binding	11/2341	29/17697	0.000740944	0.0319176	0.0290078	FUS/GAS2L1/GTF2B/JMJD1C/MED12/MED13/MED16/MED24/NCOA6/NSD1/NUP62	11
GO:0017048	Rho GTPase binding	39/2341	177/17697	0.000819115	0.0339781	0.0308805	ABR/AKAP13/ARHGEF10/ARHGEF10L/ARHGEF11/ARHGEF17/ARHGEF18/ARHGEF19/ARHGEF2/ARHGEF40/ARHGEF7/CDC42BPB/DAAM2/DAPK3/DOCK4/DOCK7/DVL2/DVL3/FARP1/FGD1/FGD5/FMNL3/INF2/IQGAP2/ITSN2/KCTD10/PLEKHG4/PLEKHG5/PREX2/RASGRF2/RGL2/SOS2/SRGAP2/TIAM2/TRIO/TRIOBP/VAV2/WASF1/WHAMM	39
GO:0004707	MAP kinase activity	7/2341	14/17697	0.00102859	0.0402379	0.0365696	MAPK11/MAPK12/MAPK4/MAPK6/MAPK7/MAPK9/NLK	7
GO:0051427	hormone receptor binding	40/2341	185/17697	0.00104187	0.0402379	0.0365696	ARID1A/ASXL1/BAZ2A/C1D/CALR/CDK7/CTNNB1/DAXX/EP300/FUS/GAS2L1/GTF2B/JMJD1C/LRIF1/MED12/MED13/MED16/MED24/MED25/MMS19/NCOA6/NCOR2/NR0B1/NRIP1/NSD1/NUP62/RARB/RARG/RNF4/RXRA/SIRT1/SMARCA4/SOCS2/SRC/STAT5B/TADA3/TOB2/UCN2/ZBTB7A/ZNF366	40
GO:0042974	retinoic acid receptor binding	10/2341	26/17697	0.00113411	0.04234	0.03848	ASXL1/FUS/LRIF1/MED25/NCOA6/NCOR2/NRIP1/NSD1/RARB/RARG	10
GO:0008022	protein C-terminus binding	40/2341	187/17697	0.00129234	0.0447368	0.0406584	ABL1/AP2A1/ATXN1/CDK7/CTBP1/CTNNB1/DAB2/DAPK3/DLG4/DNM1/EP300/ERCC2/FBLN1/FBLN5/FOXN3/HIC2/IFT52/KSR1/MDC1/MED12/MYO1C/OPRL1/PEX26/PFKM/PIAS3/POLR2A/PPP2CB/RAB3A/SASH1/SH3GL1/SHANK1/SIAH1/SIRT1/SP1/SRC/SYT1/TBL1X/TCF4/TESK1/VPS4A	40
GO:0048407	platelet-derived growth factor binding	6/2341	11/17697	0.00135522	0.0447368	0.0406584	COL1A1/COL1A2/COL3A1/COL5A1/PDGFA/PDGFRB	6
GO:0070411	I-SMAD binding	6/2341	11/17697	0.00135522	0.0447368	0.0406584	AXIN2/CTNNB1/SMAD2/SMAD6/SMAD7/SMURF1	6
GO:0003730	mRNA 3'-UTR binding	23/2341	91/17697	0.00141204	0.0447368	0.0406584	CPEB3/CPSF1/DND1/ELAVL1/GEMIN5/HNRNPA0/ILF3/KHSRP/LARP1/PABPC1L/PABPC4L/PCBP4/PUM2/RBM4/RBMS2/RC3H1/RNF40/RNPS1/TIAL1/TP53/TUT1/ZFP36L1/ZNF385A	23
GO:0016410	N-acyltransferase activity	27/2341	113/17697	0.00142663	0.0447368	0.0406584	ALAS2/BRPF1/CERS5/CREBBP/DPF2/EP300/GLYATL2/GTF2B/GTF3C4/HCFC1/KAT2A/KAT2B/KAT6A/KAT8/MCM3AP/NAA40/NMT1/NMT2/PHF10/PHF20/SRCAP/TADA2B/TADA3/TAF6L/TAF9/USP22/WDR5	27
GO:0061659	ubiquitin-like protein ligase activity	47/2341	230/17697	0.00143797	0.0447368	0.0406584	ARIH2/BIRC2/CBLB/FBXL18/FBXO17/FBXO4/HUWE1/IRF2BPL/LRSAM1/MED12/MED27/MGRN1/NEDD4/NEURL2/NEURL4/PDZRN3/PIAS3/PRPF19/RABGEF1/RC3H1/RNF111/RNF121/RNF144A/RNF150/RNF185/RNF2/RNF215/RNF216/RNF24/RNF26/RNF41/SH3RF3/SIAH1/SMURF1/SMURF2/TRIM58/UBE2O/UBE4A/UBE4B/UHRF2/VHL/WWP2/ZMIZ1/ZMIZ2/ZNF598/ZNRF1/ZNRF3	47
